# Supplementary material for: Phospholipid Translocation Captured in a Bifunctional Membrane Protein MprF
Source: Research Square preprint supplement (doi:10.21203/rs.3.rs-149828/v1), 2021-01-21
Supplement: Supplementary file 2 [file 0a551c8184a9ef4106c705ae.docx]

| **Supplemental Table 1. Strains, Plasmids and Primers** | | | | |
| --- | --- | --- | --- | --- |
| ***E. coli* Strains used for clone screening and protein expression** | | | | |
| *Strain* | | *Usage* | | |
| DH5α | | Clone screening | | |
| BL21 (DE3) | | Expression of the synthase domain of *Rt*MprF | | |
| C41 (DE3) | | Expression of the full length *Rt*MprF, *Rt*MprF D234A/Y303A/R304A/E280Q/E280K/D753A mutant, *RtPa*MprF | | |
| **Plasmids used for protein expression** | | | | |
| *Plasmid* | | *Gene* | | *Restriction site* |
| pET21b | | the synthase domain of *Rt*MprF*,* Full length *Rt*MprF, *Rt*MprF D234A/Y303A/R304A/E280Q/E280K/D753A mutant, *RtPa*MprF | | Nde I, Hind III |
| **Primers used for plasmid construction** | | | | |
| *Construct* | *Primer Type* | | *Primer Sequence* | |
| *Rt*MprF | Forward primer | | 5’-GATATGACCATATGTCGAGCCCAATCGATC-3’ | |
| Reverse primer | | 5'-ATGTTAAGCTTTTTCCTCACGACCCCCT- 3' | |
| *Rt*MprF-Synthase | Forward primer | | 5’-GGGAATTCCATATGGACGATGCGGTG-3’ | |
| Reverse primer | | 5’-CCCAAGCTTTCCGCCCCCGAT-3’ | |
| *RtPa*MprF | Forward primer | | 5’-CCGGCAACGAAGCGGCCGGAGCCTGTCAGCGCGGAAGAGCTG-3’ | |
| Reverse primer | | 5’-GTGGTGGTGCTCGAGTGCGGCCGCAAGCTTGCGTTTCACCAA-3’ | |
| *Rt*MprF-D234A | Forward primer | | 5’-CACCGCATTCGCGATCGCGGCCTCG-3’ | |
| Reverse primer | | 5’-CGAGGCCGCGATCGCGAATGCGGTG-3’ | |
| *Rt*MprF-Y303A | Forward primer | | 5’-GTTCTCTGGTCCTCGCGCGCGTCATCTACAAC-3’ | |
| Reverse primer | | 5’-GTTGTAGATGACGCGCGCGAGGACCAGAGAAC-3’ | |
| *Rt*MprF-R304A | Forward primer | | 5’-CTGGTCCTCTATGCGGTCATCTACAAC-3’ | |
| Reverse primer | | 5’-GTTGTAGATGACCGCATAGAGGACCAG-3’ | |
| *Rt*MprF-Y307A | Forward primer | | 5’-CTATCGCGTCATCGCGAACGTCATTCC-3’ | |
| Reverse primer | | 5’-GGAATGACGTTCGCGATGACGCGATAG-3’ | |
| *Rt*MprF-E280Q | Forward primer | | 5’-CTTCGGCGTGTTCCAGACGATCATC-3’ | |
| Reverse primer | | 5’-GATGATCGTCTGGAACACGCCGAAG-3’ | |
| *Rt*MprF-E280K | Forward primer | | 5’-CTTCGGCGTGTTCAAAACGATCATCATC-3’ | |
| Reverse primer | | 5’-GATGATGATCGTTTTGAACACGCCGAAG-3’ | |
| *Rt*MprF-D753A | Forward primer | | 5’-AGGGATCCGTCGCGCTGATGCGTTTTT-3’ | |
| Reverse primer | | 5’-AAAAACGCATCAGCGCGACGGATCCCT-3’ | |
